# Supplementary material
Source: publisher figshare collection journal article supplement (https://acs.figshare.com/ndownloader/files/24159258)
Supplement: Supplementary file 1 [file 24159258]

## Sheet: Table S5
Table S5. List of peptide-to-spectrum matches (PSMs) assigned in the clinical samples (FDR<1%).
Sample	.DAT file	MS/MS query	MS/MS Scan	Target-Validated	m/z observed	m/z calculated	Charge	RT	Rank	Sequence	Modifications	IonScore threshold	IonScore	Expect	'-log(expect)	Matching proteins
Q10848_MS20-028_naso4	F218034	269	3999	2020-01-01	438.742	438.743	2	807	1	EITVATSR		35.69	40.55	0.00061233	3.213	hCoV-19/Italy/INMI1-isl/2020|EPI_ISL_410545|2020-01-29_M
Q10841_MS20-028_naso7_test_incl-only_z	F218021	430	4752	2020-01-01	443.704	443.706	2	939	1	GFYAEGSR		29.21	34.08	0.00099664	3.0015	hCoV-19/Italy/INMI1-isl/2020|EPI_ISL_410545|2020-01-29_N
Q10841_MS20-028_naso7_test_incl-only_z	F218021	431	4763	2020-01-01	443.705	443.706	2	941	1	GFYAEGSR		27.82	40.77	0.00015494	3.8098	hCoV-19/Italy/INMI1-isl/2020|EPI_ISL_410545|2020-01-29_N
Q10841_MS20-028_naso7_test_incl-only_z	F218021	818	4662	2020-01-01	564.783	564.786	2	923	1	ADETQALPQR		33.5	61.22	5.1724e-06	5.2863	hCoV-19/Italy/INMI1-isl/2020|EPI_ISL_410545|2020-01-29_N
Q10841_MS20-028_naso7_test_incl-only_z	F218021	820	4648	2020-01-01	564.784	564.786	2	920	1	ADETQALPQR		33.27	45.82	0.00017018	3.7691	hCoV-19/Italy/INMI1-isl/2020|EPI_ISL_410545|2020-01-29_N
Q10841_MS20-028_naso7_test_incl-only_z	F218021	822	4687	2020-01-01	564.784	564.786	2	927	1	ADETQALPQR		32.85	44.98	0.00018744	3.7271	hCoV-19/Italy/INMI1-isl/2020|EPI_ISL_410545|2020-01-29_N
Q10841_MS20-028_naso7_test_incl-only_z	F218021	913	1945	2020-01-01	628.832	628.833	2	418	1	KADETQALPQR		34.76	59	1.1519e-05	4.9386	hCoV-19/Italy/INMI1-isl/2020|EPI_ISL_410545|2020-01-29_N
Q10841_MS20-028_naso7_test_incl-only_z	F218021	914	1955	2020-01-01	628.833	628.833	2	420	1	KADETQALPQR		34.85	86.52	2.0836e-08	7.6812	hCoV-19/Italy/INMI1-isl/2020|EPI_ISL_410545|2020-01-29_N
Q10841_MS20-028_naso7_test_incl-only_z	F218021	915	1967	2020-01-01	628.833	628.833	2	422	1	KADETQALPQR		33.66	94.22	2.6869e-09	8.5707	hCoV-19/Italy/INMI1-isl/2020|EPI_ISL_410545|2020-01-29_N
Q10841_MS20-028_naso7_test_incl-only_z	F218021	916	1978	2020-01-01	628.834	628.833	2	424	1	KADETQALPQR		34.12	94.37	2.8882e-09	8.5394	hCoV-19/Italy/INMI1-isl/2020|EPI_ISL_410545|2020-01-29_N
Q10841_MS20-028_naso7_test_incl-only_z	F218021	931	1011	2020-01-01	462.255	462.256	3	229	1	KKADETQALPQR		28	28.61	0.0028698	2.5422	hCoV-19/Italy/INMI1-isl/2020|EPI_ISL_410545|2020-01-29_N
Q10851_MS20-028_naso8	F218050	368	5212	2020-01-01	443.706	443.706	2	1017	1	GFYAEGSR		27.61	36.88	0.00059484	3.2256	hCoV-19/Italy/INMI1-isl/2020|EPI_ISL_410545|2020-01-29_N
Q10851_MS20-028_naso8	F218050	369	5200	2020-01-01	443.706	443.706	2	1014	1	GFYAEGSR		27.45	38.68	0.00037945	3.4208	hCoV-19/Italy/INMI1-isl/2020|EPI_ISL_410545|2020-01-29_N
Q10851_MS20-028_naso8	F218050	742	3703	2020-01-01	546.271	546.272	2	752	1	LDDKDPNFK		31	50.95	5.4014e-05	4.2675	hCoV-19/Italy/INMI1-isl/2020|EPI_ISL_410545|2020-01-29_N
Q10851_MS20-028_naso8	F218050	743	3715	2020-01-01	546.272	546.272	2	754	1	LDDKDPNFK		29	42.16	0.00030195	3.5201	hCoV-19/Italy/INMI1-isl/2020|EPI_ISL_410545|2020-01-29_N
Q10851_MS20-028_naso8	F218050	744	3726	2020-01-01	546.272	546.272	2	757	1	LDDKDPNFK		30	36.77	0.0011922	2.9236	hCoV-19/Italy/INMI1-isl/2020|EPI_ISL_410545|2020-01-29_N
Q10851_MS20-028_naso8	F218050	745	3668	2020-01-01	546.272	546.272	2	746	1	LDDKDPNFK		25	26.02	0.004936	2.3066	hCoV-19/Italy/INMI1-isl/2020|EPI_ISL_410545|2020-01-29_N
Q10851_MS20-028_naso8	F218050	746	3692	2020-01-01	546.273	546.272	2	750	1	LDDKDPNFK		29	43.46	0.00021105	3.6756	hCoV-19/Italy/INMI1-isl/2020|EPI_ISL_410545|2020-01-29_N
Q10851_MS20-028_naso8	F218050	749	3680	2020-01-01	546.274	546.272	2	748	1	LDDKDPNFK		29	32.27	0.0027021	2.5683	hCoV-19/Italy/INMI1-isl/2020|EPI_ISL_410545|2020-01-29_N
Q10851_MS20-028_naso8	F218050	811	4946	2020-01-01	564.786	564.786	2	967	1	ADETQALPQR		31.43	90.99	5.5731e-09	8.2539	hCoV-19/Italy/INMI1-isl/2020|EPI_ISL_410545|2020-01-29_N
Q10851_MS20-028_naso8	F218050	812	4932	2020-01-01	564.786	564.786	2	965	1	ADETQALPQR		31.34	91.03	5.4037e-09	8.2673	hCoV-19/Italy/INMI1-isl/2020|EPI_ISL_410545|2020-01-29_N
Q10851_MS20-028_naso8	F218050	813	4917	2020-01-01	564.786	564.786	2	963	1	ADETQALPQR		31.31	91.06	5.3273e-09	8.2735	hCoV-19/Italy/INMI1-isl/2020|EPI_ISL_410545|2020-01-29_N
Q10851_MS20-028_naso8	F218050	814	4846	2020-01-01	564.786	564.786	2	952	1	ADETQALPQR		31.31	57.64	1.1709e-05	4.9315	hCoV-19/Italy/INMI1-isl/2020|EPI_ISL_410545|2020-01-29_N
Q10851_MS20-028_naso8	F218050	815	4858	2020-01-01	564.786	564.786	2	954	1	ADETQALPQR		31.31	70.32	6.317e-07	6.1995	hCoV-19/Italy/INMI1-isl/2020|EPI_ISL_410545|2020-01-29_N
Q10851_MS20-028_naso8	F218050	816	4969	2020-01-01	564.786	564.786	2	972	1	ADETQALPQR		31.31	70.27	6.3901e-07	6.1945	hCoV-19/Italy/INMI1-isl/2020|EPI_ISL_410545|2020-01-29_N
Q10851_MS20-028_naso8	F218050	817	4901	2020-01-01	564.786	564.786	2	961	1	ADETQALPQR		31.31	91.09	5.2906e-09	8.2765	hCoV-19/Italy/INMI1-isl/2020|EPI_ISL_410545|2020-01-29_N
Q10851_MS20-028_naso8	F218050	818	4886	2020-01-01	564.786	564.786	2	959	1	ADETQALPQR		31.31	91.04	5.3519e-09	8.2715	hCoV-19/Italy/INMI1-isl/2020|EPI_ISL_410545|2020-01-29_N
Q10851_MS20-028_naso8	F218050	819	4871	2020-01-01	564.786	564.786	2	956	1	ADETQALPQR		31.31	74.67	2.3201e-07	6.6345	hCoV-19/Italy/INMI1-isl/2020|EPI_ISL_410545|2020-01-29_N
Q10851_MS20-028_naso8	F218050	820	4958	2020-01-01	564.786	564.786	2	970	1	ADETQALPQR		31.31	90.85	5.5913e-09	8.2525	hCoV-19/Italy/INMI1-isl/2020|EPI_ISL_410545|2020-01-29_N
Q10851_MS20-028_naso8	F218050	922	2289	2020-01-01	419.559	419.558	3	491	1	KADETQALPQR		31	41.09	0.00061928	3.2081	hCoV-19/Italy/INMI1-isl/2020|EPI_ISL_410545|2020-01-29_N
Q10851_MS20-028_naso8	F218050	923	2268	2020-01-01	628.835	628.833	2	487	1	KADETQALPQR		32.04	90.65	6.931e-09	8.1592	hCoV-19/Italy/INMI1-isl/2020|EPI_ISL_410545|2020-01-29_N
Q10851_MS20-028_naso8	F218050	924	2312	2020-01-01	419.559	419.558	3	496	1	KADETQALPQR		32.04	42.2	0.00048506	3.3142	hCoV-19/Italy/INMI1-isl/2020|EPI_ISL_410545|2020-01-29_N
Q10851_MS20-028_naso8	F218050	925	2300	2020-01-01	419.559	419.558	3	493	1	KADETQALPQR		32.04	49.18	9.7229e-05	4.0122	hCoV-19/Italy/INMI1-isl/2020|EPI_ISL_410545|2020-01-29_N
Q10851_MS20-028_naso8	F218050	926	2245	2020-01-01	628.835	628.833	2	482	1	KADETQALPQR		31.99	101.22	6.003e-10	9.2216	hCoV-19/Italy/INMI1-isl/2020|EPI_ISL_410545|2020-01-29_N
Q10851_MS20-028_naso8	F218050	927	2315	2020-01-01	628.835	628.833	2	496	1	KADETQALPQR		31.53	104.05	2.8139e-10	9.5507	hCoV-19/Italy/INMI1-isl/2020|EPI_ISL_410545|2020-01-29_N
Q10851_MS20-028_naso8	F218050	928	2303	2020-01-01	628.835	628.833	2	494	1	KADETQALPQR		31.53	98.81	9.4039e-10	9.0267	hCoV-19/Italy/INMI1-isl/2020|EPI_ISL_410545|2020-01-29_N
Q10851_MS20-028_naso8	F218050	929	2279	2020-01-01	628.835	628.833	2	489	1	KADETQALPQR		31.53	111.13	5.512e-11	10.2587	hCoV-19/Italy/INMI1-isl/2020|EPI_ISL_410545|2020-01-29_N
Q10851_MS20-028_naso8	F218050	930	2221	2020-01-01	628.835	628.833	2	478	1	KADETQALPQR		31.53	107.23	1.353e-10	9.8687	hCoV-19/Italy/INMI1-isl/2020|EPI_ISL_410545|2020-01-29_N
Q10851_MS20-028_naso8	F218050	931	2291	2020-01-01	628.835	628.833	2	491	1	KADETQALPQR		31.53	102.6	3.9292e-10	9.4057	hCoV-19/Italy/INMI1-isl/2020|EPI_ISL_410545|2020-01-29_N
Q10851_MS20-028_naso8	F218050	932	2185	2020-01-01	628.835	628.833	2	471	1	KADETQALPQR		31.53	94.23	2.6996e-09	8.5687	hCoV-19/Italy/INMI1-isl/2020|EPI_ISL_410545|2020-01-29_N
Q10851_MS20-028_naso8	F218050	933	2197	2020-01-01	628.835	628.833	2	474	1	KADETQALPQR		31.53	98.77	9.4909e-10	9.0227	hCoV-19/Italy/INMI1-isl/2020|EPI_ISL_410545|2020-01-29_N
Q10851_MS20-028_naso8	F218050	934	2209	2020-01-01	628.835	628.833	2	476	1	KADETQALPQR		31.53	98.79	9.4473e-10	9.0247	hCoV-19/Italy/INMI1-isl/2020|EPI_ISL_410545|2020-01-29_N
Q10851_MS20-028_naso8	F218050	935	2233	2020-01-01	628.835	628.833	2	480	1	KADETQALPQR		31.53	104.07	2.801e-10	9.5527	hCoV-19/Italy/INMI1-isl/2020|EPI_ISL_410545|2020-01-29_N
Q10851_MS20-028_naso8	F218050	936	2257	2020-01-01	628.835	628.833	2	485	1	KADETQALPQR		31.53	110.75	6.016e-11	10.2207	hCoV-19/Italy/INMI1-isl/2020|EPI_ISL_410545|2020-01-29_N
Q10851_MS20-028_naso8	F218050	937	2173	2020-01-01	628.835	628.833	2	469	1	KADETQALPQR		31.53	90.31	6.6574e-09	8.1767	hCoV-19/Italy/INMI1-isl/2020|EPI_ISL_410545|2020-01-29_N
Q10851_MS20-028_naso8	F218050	938	2161	2020-01-01	628.836	628.833	2	467	1	KADETQALPQR		32.45	83.28	4.1586e-08	7.3811	hCoV-19/Italy/INMI1-isl/2020|EPI_ISL_410545|2020-01-29_N
Q10851_MS20-028_naso8	F218050	997	1162	2020-01-01	462.256	462.256	3	262	1	KKADETQALPQR		26	34.38	0.00079726	3.0984	hCoV-19/Italy/INMI1-isl/2020|EPI_ISL_410545|2020-01-29_N
Q10851_MS20-028_naso8	F218050	998	1158	2020-01-01	692.88	692.881	2	261	1	KKADETQALPQR		29	86.72	9.572e-09	8.019	hCoV-19/Italy/INMI1-isl/2020|EPI_ISL_410545|2020-01-29_N
Q10851_MS20-028_naso8	F218050	999	1124	2020-01-01	462.256	462.256	3	255	1	KKADETQALPQR		28	63.65	1.6104e-06	5.7931	hCoV-19/Italy/INMI1-isl/2020|EPI_ISL_410545|2020-01-29_N
Q10851_MS20-028_naso8	F218050	1000	1137	2020-01-01	462.256	462.256	3	257	1	KKADETQALPQR		27	60.76	2.3691e-06	5.6254	hCoV-19/Italy/INMI1-isl/2020|EPI_ISL_410545|2020-01-29_N
Q10851_MS20-028_naso8	F218050	1001	1099	2020-01-01	462.256	462.256	3	251	1	KKADETQALPQR		31	58.88	8.9138e-06	5.0499	hCoV-19/Italy/INMI1-isl/2020|EPI_ISL_410545|2020-01-29_N
Q10851_MS20-028_naso8	F218050	1002	1077	2020-01-01	692.881	692.881	2	247	1	KKADETQALPQR		31.76	111.23	5.6878e-11	10.2451	hCoV-19/Italy/INMI1-isl/2020|EPI_ISL_410545|2020-01-29_N
Q10851_MS20-028_naso8	F218050	1003	1150	2020-01-01	462.256	462.256	3	260	1	KKADETQALPQR		27	49.17	3.3327e-05	4.4772	hCoV-19/Italy/INMI1-isl/2020|EPI_ISL_410545|2020-01-29_N
Q10851_MS20-028_naso8	F218050	1004	1139	2020-01-01	692.881	692.881	2	258	1	KKADETQALPQR		29	95.45	1.2853e-09	8.891	hCoV-19/Italy/INMI1-isl/2020|EPI_ISL_410545|2020-01-29_N
Q10851_MS20-028_naso8	F218050	1005	1063	2020-01-01	462.257	462.256	3	244	1	KKADETQALPQR		27	44.09	0.0001038	3.9838	hCoV-19/Italy/INMI1-isl/2020|EPI_ISL_410545|2020-01-29_N
Q10851_MS20-028_naso8	F218050	1006	1111	2020-01-01	462.257	462.256	3	253	1	KKADETQALPQR		26	60.55	2.2171e-06	5.6542	hCoV-19/Italy/INMI1-isl/2020|EPI_ISL_410545|2020-01-29_N
Q10851_MS20-028_naso8	F218050	1007	1087	2020-01-01	462.257	462.256	3	249	1	KKADETQALPQR		26	52.19	1.4021e-05	4.8532	hCoV-19/Italy/INMI1-isl/2020|EPI_ISL_410545|2020-01-29_N
Q10851_MS20-028_naso8	F218050	1008	1126	2020-01-01	692.881	692.881	2	256	1	KKADETQALPQR		31.73	111.16	5.742e-11	10.2409	hCoV-19/Italy/INMI1-isl/2020|EPI_ISL_410545|2020-01-29_N
Q10851_MS20-028_naso8	F218050	1009	1089	2020-01-01	692.881	692.881	2	249	1	KKADETQALPQR		31.73	106.39	1.7221e-10	9.7639	hCoV-19/Italy/INMI1-isl/2020|EPI_ISL_410545|2020-01-29_N
Q10851_MS20-028_naso8	F218050	1010	1051	2020-01-01	462.257	462.256	3	242	1	KKADETQALPQR		27	34.21	0.0010635	2.9733	hCoV-19/Italy/INMI1-isl/2020|EPI_ISL_410545|2020-01-29_N
Q10851_MS20-028_naso8	F218050	1011	1075	2020-01-01	462.257	462.256	3	247	1	KKADETQALPQR		26	47.13	3.9314e-05	4.4054	hCoV-19/Italy/INMI1-isl/2020|EPI_ISL_410545|2020-01-29_N
Q10851_MS20-028_naso8	F218050	1012	1065	2020-01-01	692.882	692.881	2	244	1	KKADETQALPQR		31.62	107.24	1.3782e-10	9.8607	hCoV-19/Italy/INMI1-isl/2020|EPI_ISL_410545|2020-01-29_N
Q10851_MS20-028_naso8	F218050	1013	1053	2020-01-01	692.882	692.881	2	242	1	KKADETQALPQR		29	92.02	2.7802e-09	8.5559	hCoV-19/Italy/INMI1-isl/2020|EPI_ISL_410545|2020-01-29_N
Q10851_MS20-028_naso8	F218050	1014	1101	2020-01-01	692.882	692.881	2	251	1	KKADETQALPQR		31.62	111.11	5.6536e-11	10.2477	hCoV-19/Italy/INMI1-isl/2020|EPI_ISL_410545|2020-01-29_N
Q10851_MS20-028_naso8	F218050	1015	1113	2020-01-01	692.882	692.881	2	253	1	KKADETQALPQR		31.62	110.35	6.7348e-11	10.1717	hCoV-19/Italy/INMI1-isl/2020|EPI_ISL_410545|2020-01-29_N
